1  
2  
3  
4  
5  
6  
7  
8  
9  
10  
11  
12  
13  
14  
15  
16  
17  
18  
19  
20  
21  
22  
23  
24  
25  
26  
27  
28  
29  
30  
31  
32  
33  
34  
35

**Full title:**

**Prominent features of the amino acid mutation landscape in cancer**

**Short title:**

**R>H and E>K mutations are prominent features in many cancers**

Zachary A. Szpiech<sup>1,\*</sup>, Nicolas B. Strauli<sup>1</sup>, Katharine A. White<sup>2</sup>, Diego Garrido Ruiz<sup>3</sup>,  
Matthew P. Jacobson<sup>1,3</sup>, Diane L. Barber<sup>2</sup>, Ryan D. Hernandez<sup>1,4,5,\*</sup>

<sup>1</sup>Department of Bioengineering and Therapeutic Sciences, University of California, San Francisco.

<sup>2</sup>Department of Cell and Tissue Biology, University of California, San Francisco.

<sup>3</sup>Department of Pharmaceutical Chemistry, University of California, San Francisco.

<sup>4</sup>Quantitative Biosciences Institute, University of California, San Francisco.

<sup>5</sup>Institute for Human Genetics, University of California, San Francisco.

\*Corresponding authors

Ryan D Hernandez, PhD  
UCSF MC 2530  
Byers Hall Room 308  
1700 4th Street  
San Francisco, CA 94143  
Email: ryan.hernandez@ucsf.edu

Zachary A Szpiech, PhD  
UCSF MC 2530  
Byers Hall Room 308  
1700 4th Street  
San Francisco, CA 94143  
Email: zachary.szpiech@ucsf.edu

## 36 **ABSTRACT**

37 Cancer can be viewed as a set of different diseases with distinctions based on  
38 tissue origin, driver mutations, and genetic signatures. Accordingly, each of these  
39 distinctions has been used to classify cancer subtypes and to reveal common features.  
40 Here, we present a different analysis of cancer based on amino acid mutation signatures.  
41 Non-negative Matrix Factorization and principal component analysis of 29 cancers  
42 revealed six amino acid mutation signatures, including four signatures with either  
43 prominent arginine to histidine (Arg>His) or glutamate to lysine (Glu>Lys) mutations.  
44 Sample-level analyses reveal that while some cancers are heterogeneous, others are  
45 largely dominated by one type of mutation. This suggests that our classification of  
46 cancers based on amino acid mutation patterns may provide avenues of inquiry pertaining  
47 to specific protein mutations that may generate novel insights into cancer biology.

## 48 49 **INTRODUCTION**

50 Cancers have been described as open, complex, and adaptive systems [1].  
51 Reflecting this, cancer progression is determined in part by genetic diversification and  
52 clonal selection within complex tissue landscapes and with changing tumor properties  
53 and microenvironment features [2, 3]. Genetic sequencing of tumor samples has been  
54 critically important in developing the evolutionary theory of cancer. While cancers  
55 traditionally have been, and continue to be, classified by tissue of origin, genetic  
56 sequencing has allowed for classification based on driver mutations [4] or nucleotide  
57 mutation signatures [5]. However, cancer cell adaptation is mediated by changes at the  
58 protein level that alter cell biology and enable cancer cell behaviors such as increased  
59 proliferation and cell survival. Existing cancer classifications by nucleotide mutation

60 signatures lack a link between the underlying genetic landscape and effects on cancer cell  
61 phenotypes. Analysis of cancers by amino acid mutations could provide important  
62 connections between cancer evolution and adaptive biological phenotypes as well as  
63 provide insight into how specific classes of amino acid mutations may generally alter the  
64 function of the proteins in which they are found. There have been some studies to  
65 examine amino acid mutations across cancers [6, 7], but these have relied on simple  
66 mutation counting methods.

67 Here we take a machine-learning approach to analyze amino acid mutations  
68 across 29 cancers in order to identify characteristic amino acid mutation signatures. Our  
69 analyses reveal that some cancer types have mutation signatures dominated by arginine to  
70 histidine (Arg>His) mutations, some have signatures dominated by glutamate to lysine  
71 (Glu>Lys), and others have more complex signatures that lack a single dominant amino  
72 acid mutation. Importantly, this approach identifies not only which amino acid mutations  
73 are prevalent among cancers but also which amino acid mutations tend to occur together.  
74 For example, cancers with strong Arg>His signatures will also frequently have many  
75 Ala>Thr mutations but are unlikely to have many Glu>Lys mutations (despite all of these  
76 amino acid transitions resulting from a G>A nucleotide mutation).

## 77 **RESULTS**

### 78 **Several cancers are enriched for R>H and E>K amino acid mutations**

79 Multiple studies have interrogated nucleotide mutation biases by analyzing  
80 somatic variation across a wide range of cancers [4, 5]. However, in protein coding  
81 regions of the genome (i.e. the exome), it is essential to study patterns of amino acid  
82 variation to reveal information about potential functional effects at the protein level. We

83 characterized the global properties of amino acid mutations encoded by somatic  
84 mutations across a range of cancers by analyzing a tumor-normal paired mutation  
85 database [5] consisting of 6,931 samples across 29 cancer types. We applied filtering to  
86 remove sequencing artifacts and restricted mutation data to nonsynonymous amino acid  
87 mutations (see Methods, Tables S1 and S2 for details).

88 Using this amino acid mutation database, we performed an unbiased  
89 characterization of mutation signatures across cancer types using Non-negative Matrix  
90 Factorization (NMF), which has proven to be a useful tool for pattern discovery in cancer  
91 tissue mutation datasets [5] and other biological systems [8]. Applying NMF to the  
92 pooled mutation data reveals six mutation signatures at the amino acid level (Fig S1G),  
93 including two with strong Arg>His components and two with strong Glu>Lys  
94 components (Fig 1A, Fig S1). Although the cancers are comprised of a mixture of the  
95 signatures identified, ten cancers (AML, colorectal, esophageal, low grade glioma,  
96 kidney chromophobe, medulloblastoma, pancreatic, prostate, stomach, and uterine) have  
97 majority contributions from Arg>His-prominent mutation signatures (R>H and  
98 A>T/R>H). We also identify four cancers (bladder, cervix, head and neck, and  
99 melanoma) that have majority contributions from Glu>Lys-prominent mutation  
100 signatures (E>K and E>K/E>Q). Additionally, there are two complex signatures not  
101 dominated by any particular amino acid mutation. Glioblastoma, kidney papillary, liver,  
102 and thyroid cancers have majority contribution from the Complex 1 signature, and lung  
103 adenocarcinoma, small cell lung, squamous cell lung, and neuroblastoma cancers all have  
104 majority contribution from the Complex 2 signature. Finally, seven cancers from a

105 variety of tissues (ALL, breast, CLL, clear cell kidney, B-cell lymphoma, myeloma, and  
106 ovarian) have heterogeneous mutation signature contributions.

107

108 **Fig 1. Arg>His and Glu>Lys mutations define mutation signatures of a subset of**  
109 **cancers.**

110 (A) Heatmap representation of six-component NMF clustering. Of the six amino acid  
111 mutation signatures identified, four have prominent charge-changing mutations: Arg>His  
112 (R>H); Ala>Thr (A>T) and R>H; Glu>Lys (E>K); and E>K and Glu>Gln (E>Q). Two  
113 complex signatures were also identified. Color scale represents scaled contribution of  
114 each signature for a given cancer type. Signature and NMF fit details can be found in  
115 Fig S1. (B) Principal component analysis of nonsynonymous amino acid mutations. PC1  
116 separates cancers with high R>H from cancers with high E>K; PC2 separates cancers  
117 with complex signatures. Individual PC loadings can be found in Fig S2.

118

119 **Visualizing Amino Acid Mutation Properties with Principal Component Analysis**

120 To alternatively visualize the amino acid mutation spectrum, we use principal  
121 component analysis to reveal cancers clustering by dominant mutation classes (Fig 1B).  
122 We find that PC1 separates Arg>His dominant cancers from Glu>Lys dominant cancers  
123 and that PC2 separates cancers with more complex signatures (Fig S2). This result  
124 reinforces our observation that Arg>His and Glu>Lys mutations are characteristic  
125 signatures of several cancers.

126

127

## 128 **Individual Cancer Samples Recapitulate Amino Acid Mutation Patterns**

129 We also analyze samples individually with NMF and find that Arg>His and  
130 Glu>Lys features continue to dominate (Figs 2A and S3A). For many cancer subtypes  
131 (melanoma, bladder, uterine, colorectal, low-grade glioma, cervix, neuroblastoma, and  
132 the three different lung cancers), individual patients within each  
133 cancer exhibit consistent amino acid signatures (Fig 2B). This is true even within  
134 clinically diverse cancers such as bladder, uterine, colorectal, and lung cancer, which all  
135 have multiple identified driver mutations. This suggests that the amino acid signatures we  
136 identified may be independent of underlying driver mutation and may instead be  
137 reporting on common features of the cancer, tumor microenvironment, or selective  
138 pressures, which may be targeted therapeutically.

139

### 140 **Fig 2. Amino acid mutation signatures for individual samples.**

141 (A) A heatmap representation of the six-component NMF clustering results for individual  
142 cancer samples (only those with >10 total nonsynonymous mutations). Samples with the  
143 same maximum signature component were grouped and sorted. Four amino acid  
144 mutation signatures identified (R>H, E>K, E>K/E>Q, Complex 2) overlap with  
145 signatures in Fig 1A. Color scale represents scaled contribution of each signature for a  
146 given sample. Signature and NMF fit details can be found in Fig S3. (B) Bars show the  
147 total fraction of individual samples with a majority of a particular signature within  
148 each cancer. Within cancers, a large fraction of individual samples tend to have similar  
149 signature components.

150

151 As NMF decomposes a sample into a mixture of characteristic signatures, we can  
152 further visualize the normalized mixture coefficients from the individual-level NMF  
153 along the three mutation signatures with dominant Arg>His or Glu>Lys components  
154 (R>H, E>K, and E>K/E>Q signatures; Fig 3) to determine whether samples tend to be an  
155 equal mixture of several signatures or whether they tend to be exclusively composed of a  
156 single signature. Indeed, Fig 3 shows a clear separation of samples with a high proportion  
157 of Glu>Lys from other signatures.

158

159 **Fig 3. Normalized NMF mixture coefficients for individual samples.**

160 Plot of the normalized mixture coefficients across the three mutation signatures with high  
161 R>H or E>K components for every individual sample. Colors represent the major  
162 component for each sample based on the full individual-level NMF analysis. Here we see  
163 a dramatic separation of samples in the E>K component to the near exclusion of other  
164 signatures.

165

166 **DISCUSSION**

167 Our analyses reveal that a subset of all possible amino acid mutations dominate  
168 the mutation landscape of cancers, with Glu>Lys and Arg>His mutations being the most  
169 prominent features of identified mutation signatures. Proteomic changes can allow cancer  
170 cells to adapt to dynamic pressures including changes in matrix composition, oxygen and  
171 nutrient availability, intracellular metabolism, as well as increased intracellular pH (pHi),  
172 the latter enabling tumorigenic cell behaviors [9-13]. The strong bias towards amino acid  
173 mutations that alter charge in our identified mutation signatures may suggest an adaptive

174 advantage to one or more of these pressures. Glu>Lys mutations swap a negatively  
175 charged amino acid for a positively charged amino acid, which may in some cases effect  
176 protein function. Furthermore, whereas arginine (pKa ~12) should always be protonated,  
177 histidine (pKa ~6.5) can titrate within the narrow physiological pH range. Indeed, the pH-  
178 sensitive function of many wild-type proteins has been shown to be mediated by titratable  
179 histidine residues [14-16]. Therefore, while both of these mutation classes could  
180 substantially affect protein function, we predict that some Arg>His mutations may be  
181 adaptive to increased pHi, conferring a gain in pH sensing to the mutant protein.

182         Given the potential adaptive gain in pH sensing that Arg>His mutations could  
183 confer, it is interesting to note that Arg>His mutations define the mutation landscape of a  
184 diverse set of cancers across a range of tissues including brain (low-grade glioma),  
185 digestive (colorectal), reproductive (uterine), and blood (AML) cancers. These cancers do  
186 not have overlapping nucleotide mutation signatures [5], which suggests that the amino  
187 acid mutation signatures we identified may reflect other aspects of the cancers including  
188 distinct physiological pressures, microenvironment features, or functional requirements  
189 that could be important for limiting disease progression, particularly where targeted  
190 approaches fail [17-19].

## 191 192 **MATERIALS AND METHODS**

### 193 194 **Mutation Dataset Filtering**

195         We validated the dataset [5] by comparing known frequencies of well-studied  
196 cancer driver genes with observed frequencies in the dataset. Specifically, BRAF is  
197 mutated in 40–50% of melanoma samples, and IDH1 is mutated in 75–85%, low-grade  
198 glioma, AML, and glioblastoma samples are mutated 75-85%, 8–12%, and 1–5% of the



199 time, respectively. We used the p53 database (<http://p53.fr/index.html>) to find expected  
200 p53 mutation frequency for various cancers: colorectal, head and neck, pancreatic,  
201 stomach, liver, and breast cancer have 43%, 42%, 34%, 32%, 31%, and 22% p53  
202 mutation rates, respectively. The observed mutation frequencies were consistently lower  
203 than expected for the genes/cancers we assessed, which suggests that the dataset authors  
204 [5] were perhaps too stringent in quality control (QC) filtering. Different levels of QC  
205 filtering were performed, and we systematically relaxed filters in order to recapitulate the  
206 expected mutation frequencies of the selected canonical driver genes. Applying only the  
207 ‘sequencing artifact’ QC filter (from [5]) most closely recapitulated expected mutation  
208 frequencies for the canonical driver genes, and this filter alone was used for the  
209 remainder of the bioinformatics analyses.

210

### 211 **Mapping somatic SNPs**

212 After filtering we used part of the PolyPhen2 [20] pipeline to map mutations to  
213 UCSC Canonical transcripts and restricted to nonsynonymous amino acid changes. The  
214 following cancers had reduced sample sizes after filtering and nonsynonymous mutation  
215 restriction: AML: one sample eliminated through QC filtering, two samples eliminated  
216 because all mutations were synonymous; low grade glioma: one sample eliminated  
217 because after QC filtering all remaining mutations were synonymous; glioblastoma: two  
218 samples eliminated because all mutations were synonymous. All Pilocytic Astrocytoma  
219 samples were excluded from future analysis due to low total nonsynonymous mutations  
220 per sample.

221

## 222 **Mutation frequency data sets**

223 For the individual sample data, we represent each sample as a row vector with  
224 elements giving the mutation counts observed for each nonsynonymous mutation (e.g.  
225 Ala>Cys, Ala>Asp, etc.) and removing all samples with <10 total observed mutations.  
226 For the aggregated data set, we sum the mutation counts across all samples of the same  
227 cancer type (including samples with <10 mutations), giving one row vector for each  
228 cancer type where each element represents the total number of observed nonsynonymous  
229 mutations across all samples. For non-negative matrix factorization and principal  
230 component analysis, we divide each row by the row sum.

231 NMF is an unsupervised learning method used to decompose a data matrix into a  
232 product of two non-negative matrices representing a set of  $k$  signals and mixture  
233 coefficients. For example if  $\mathbf{X}$  is an  $m \times n$  matrix representing the nonsynonymous  
234 mutation frequency data, then the NMF of the data is given by

$$X = WH$$

235 where  $\mathbf{W}$  is an  $m \times k$  matrix with the  $k$  columns representing mutation signatures and  $\mathbf{H}$   
236 is a  $k \times n$  matrix representing the mixture coefficients that best reconstruct  $\mathbf{X}$ . Often it  
237 is not possible to factor  $\mathbf{X}$  exactly, so a typical approach to solving the decomposition  
238 will optimize

$$\min_{w, H \geq 0} [D(X, WH) + R(W, H)]$$

239 where  $D()$  is a loss function (often the Frobenius norm or the Kullback-Leibler  
240 divergence) and  $R()$  is a regularization function. For our NMF analyses, we utilize the  $\mathbf{R}$   
241 package *NMF* [21] with default choices for  $D()$  and  $R()$ .

242

## 243 **Principal Component Analysis (PCA)**

244 PCA is a dimension reducing learning method designed to decompose a data  
245 matrix into a set of orthogonal bases defined along the major axes of variation within the  
246 data. Here we compute the first two principal components from our mutation frequency  
247 matrix  $\mathbf{X}$ . The  $k^{\text{th}}$  principal component is represented by a vector of loadings,  $w_{(k)}$ . The  
248 first PC is then calculated as

$$w_{(1)} = \arg \max \left\{ \frac{w^T X^T X w}{w^T w} \right\}$$

249 and subsequent PCs are calculated as

$$w_{(k)} = \arg \max \left\{ \frac{w^T \hat{X}_k^T \hat{X}_k w}{w^T w} \right\}$$

250 where

$$\hat{X}_k = X - \sum_s^{k-1} X w_{(s)} w_{(s)}^T.$$

251 We use the R package *prcomp* to perform all PCA analyses.

252

## 253 **ACKNOWLEDGEMENTS**

254

255 This work was supported by National Institutes of Health grants CA178706 to

256 Diane L. Barber and Ryan D. Hernandez; CA197855 to Diane L. Barber, and HG007644

257 to Ryan D. Hernandez; and National Institutes of Health F32 grant CA177085 to

258 Katharine A. White.

259

260

261

262  
263  
264  
265  
266  
267  
268  
269  
270  
271  
272  
273  
274  
275  
276  
277  
278  
279  
280  
281  
282  
283  
284  
285  
286  
287  
288  
289  
290  
291  
292  
293  
294  
295  
296  
297  
298  
299  
300  
301  
302  
303  
304  
305

## Bibliography

1. Gillies RJ, Gatenby RA. Metabolism and its sequelae in cancer evolution and therapy. *Cancer J.* 2015;21(2):88-96. doi: 10.1097/PPO.0000000000000102. PubMed PMID: 25815848; PubMed Central PMCID: PMCPMC4446699.
2. Greaves M, Maley CC. Clonal evolution in cancer. *Nature.* 2012;481(7381):306-13. doi: 10.1038/nature10762. PubMed PMID: 22258609; PubMed Central PMCID: PMCPMC3367003.
3. Nowell PC. The clonal evolution of tumor cell populations. *Science.* 1976;194(4260):23-8. PubMed PMID: 959840.
4. Bignell GR, Greenman CD, Davies H, Butler AP, Edkins S, Andrews JM, et al. Signatures of mutation and selection in the cancer genome. *Nature.* 2010;463(7283):893-8. doi: 10.1038/nature08768. PubMed PMID: 20164919; PubMed Central PMCID: PMCPMC3145113.
5. Alexandrov LB, Nik-Zainal S, Wedge DC, Aparicio SA, Behjati S, Biankin AV, et al. Signatures of mutational processes in human cancer. *Nature.* 2013;500(7463):415-21. doi: 10.1038/nature12477. PubMed PMID: 23945592; PubMed Central PMCID: PMCPMC3776390.
6. Tan H, Bao J, Zhou X. Genome-wide mutational spectra analysis reveals significant cancer-specific heterogeneity. *Sci Rep.* 2015;5:12566. doi: 10.1038/srep12566. PubMed PMID: 26212640; PubMed Central PMCID: PMCPMC4515826.
7. Anoosha P, Sakthivel R, Michael Gromiha M. Exploring preferred amino acid mutations in cancer genes: Applications to identify potential drug targets. *Biochim Biophys Acta.* 2016;1862(2):155-65. doi: 10.1016/j.bbadis.2015.11.006. PubMed PMID: 26581171.
8. Brunet JP, Tamayo P, Golub TR, Mesirov JP. Metagenes and molecular pattern discovery using matrix factorization. *Proc Natl Acad Sci U S A.* 2004;101(12):4164-9. doi: 10.1073/pnas.0308531101. PubMed PMID: 15016911; PubMed Central PMCID: PMCPMC384712.
9. White KA, Grillo-Hill BK, Barber DL. Cancer cell behaviors mediated by dysregulated pH dynamics at a glance. *J Cell Sci.* 2017;130(4):663-9. doi: 10.1242/jcs.195297. PubMed PMID: 28202602; PubMed Central PMCID: PMCPMC5339414.
10. Cardone RA, Casavola V, Reshkin SJ. The role of disturbed pH dynamics and the Na<sup>+</sup>/H<sup>+</sup> exchanger in metastasis. *Nat Rev Cancer.* 2005;5(10):786-95. doi: 10.1038/nrc1713. PubMed PMID: 16175178.
11. Grillo-Hill BK, Choi C, Jimenez-Vidal M, Barber DL. Increased H<sup>(+)</sup> efflux is sufficient to induce dysplasia and necessary for viability with oncogene expression. *Elife.* 2015;4. doi: 10.7554/eLife.03270. PubMed PMID: 25793441; PubMed Central PMCID: PMCPMC4392478.
12. Parks SK, Chiche J, Pouyssegur J. Disrupting proton dynamics and energy metabolism for cancer therapy. *Nat Rev Cancer.* 2013;13(9):611-23. doi: 10.1038/nrc3579. PubMed PMID: 23969692.

- 306 13. Webb BA, Chimenti M, Jacobson MP, Barber DL. Dysregulated pH: a perfect  
307 storm for cancer progression. *Nat Rev Cancer*. 2011;11(9):671-7. doi: 10.1038/nrc3110.  
308 PubMed PMID: 21833026.
- 309 14. Choi CH, Webb BA, Chimenti MS, Jacobson MP, Barber DL. pH sensing by  
310 FAK-His58 regulates focal adhesion remodeling. *J Cell Biol*. 2013;202(6):849-59. doi:  
311 10.1083/jcb.201302131. PubMed PMID: 24043700; PubMed Central PMCID:  
312 PMCPMC3776353.
- 313 15. Frantz C, Barreiro G, Dominguez L, Chen X, Eddy R, Condeelis J, et al. Cofilin is  
314 a pH sensor for actin free barbed end formation: role of phosphoinositide binding. *J Cell*  
315 *Biol*. 2008;183(5):865-79. doi: 10.1083/jcb.200804161. PubMed PMID: 19029335;  
316 PubMed Central PMCID: PMCPMC2592832.
- 317 16. Webb BA, White KA, Grillo-Hill BK, Schonichen A, Choi C, Barber DL. A  
318 Histidine Cluster in the Cytoplasmic Domain of the Na-H Exchanger NHE1 Confers pH-  
319 sensitive Phospholipid Binding and Regulates Transporter Activity. *J Biol Chem*.  
320 2016;291(46):24096-104. doi: 10.1074/jbc.M116.736215. PubMed PMID: 27650500;  
321 PubMed Central PMCID: PMCPMC5104935.
- 322 17. Alfarouk KO, Stock CM, Taylor S, Walsh M, Muddathir AK, Verduzco D, et al.  
323 Resistance to cancer chemotherapy: failure in drug response from ADME to P-gp. *Cancer*  
324 *Cell Int*. 2015;15:71. doi: 10.1186/s12935-015-0221-1. PubMed PMID: 26180516;  
325 PubMed Central PMCID: PMCPMC4502609.
- 326 18. Alfarouk KO, Verduzco D, Rauch C, Muddathir AK, Adil HH, Elhassan GO, et  
327 al. Glycolysis, tumor metabolism, cancer growth and dissemination. A new pH-based  
328 etiopathogenic perspective and therapeutic approach to an old cancer question.  
329 *Oncoscience*. 2014;1(12):777-802. doi: 10.18632/oncoscience.109. PubMed PMID:  
330 25621294; PubMed Central PMCID: PMCPMC4303887.
- 331 19. Gillies RJ, Verduzco D, Gatenby RA. Evolutionary dynamics of carcinogenesis  
332 and why targeted therapy does not work. *Nat Rev Cancer*. 2012;12(7):487-93. doi:  
333 10.1038/nrc3298. PubMed PMID: 22695393; PubMed Central PMCID:  
334 PMCPMC4122506.
- 335 20. Adzhubei IA, Schmidt S, Peshkin L, Ramensky VE, Gerasimova A, Bork P, et al.  
336 A method and server for predicting damaging missense mutations. *Nat Methods*.  
337 2010;7(4):248-9. doi: 10.1038/nmeth0410-248. PubMed PMID: 20354512; PubMed  
338 Central PMCID: PMCPMC2855889.
- 339 21. Gaujoux R, Seoighe C. A flexible R package for nonnegative matrix factorization.  
340 *BMC Bioinformatics*. 2010;11:367. doi: 10.1186/1471-2105-11-367. PubMed PMID:  
341 20598126; PubMed Central PMCID: PMCPMC2912887.  
342

A

Membership Fraction

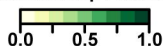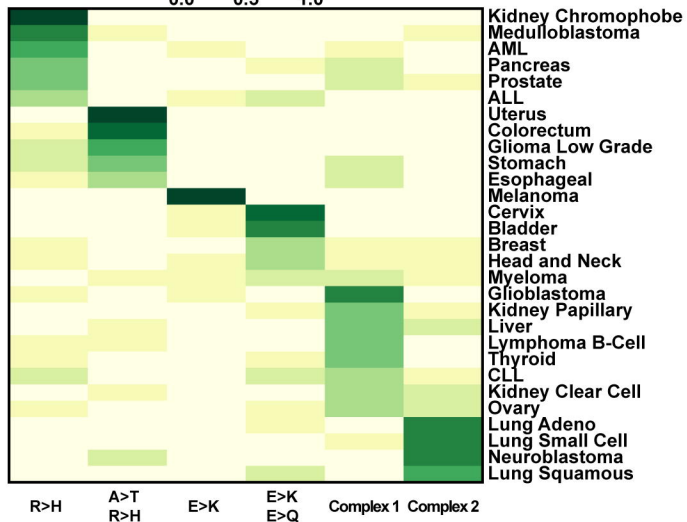

B

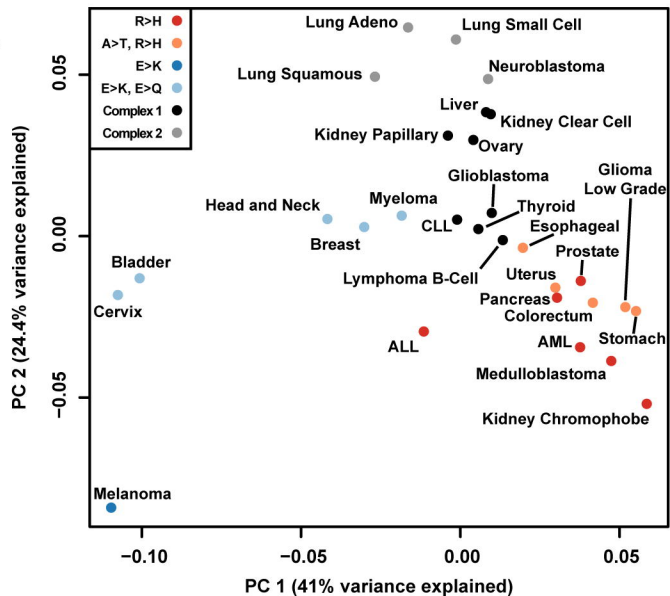



A

Membership Fraction

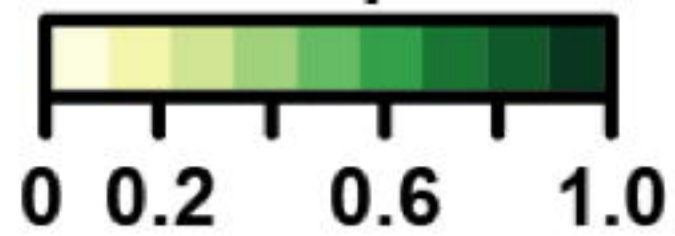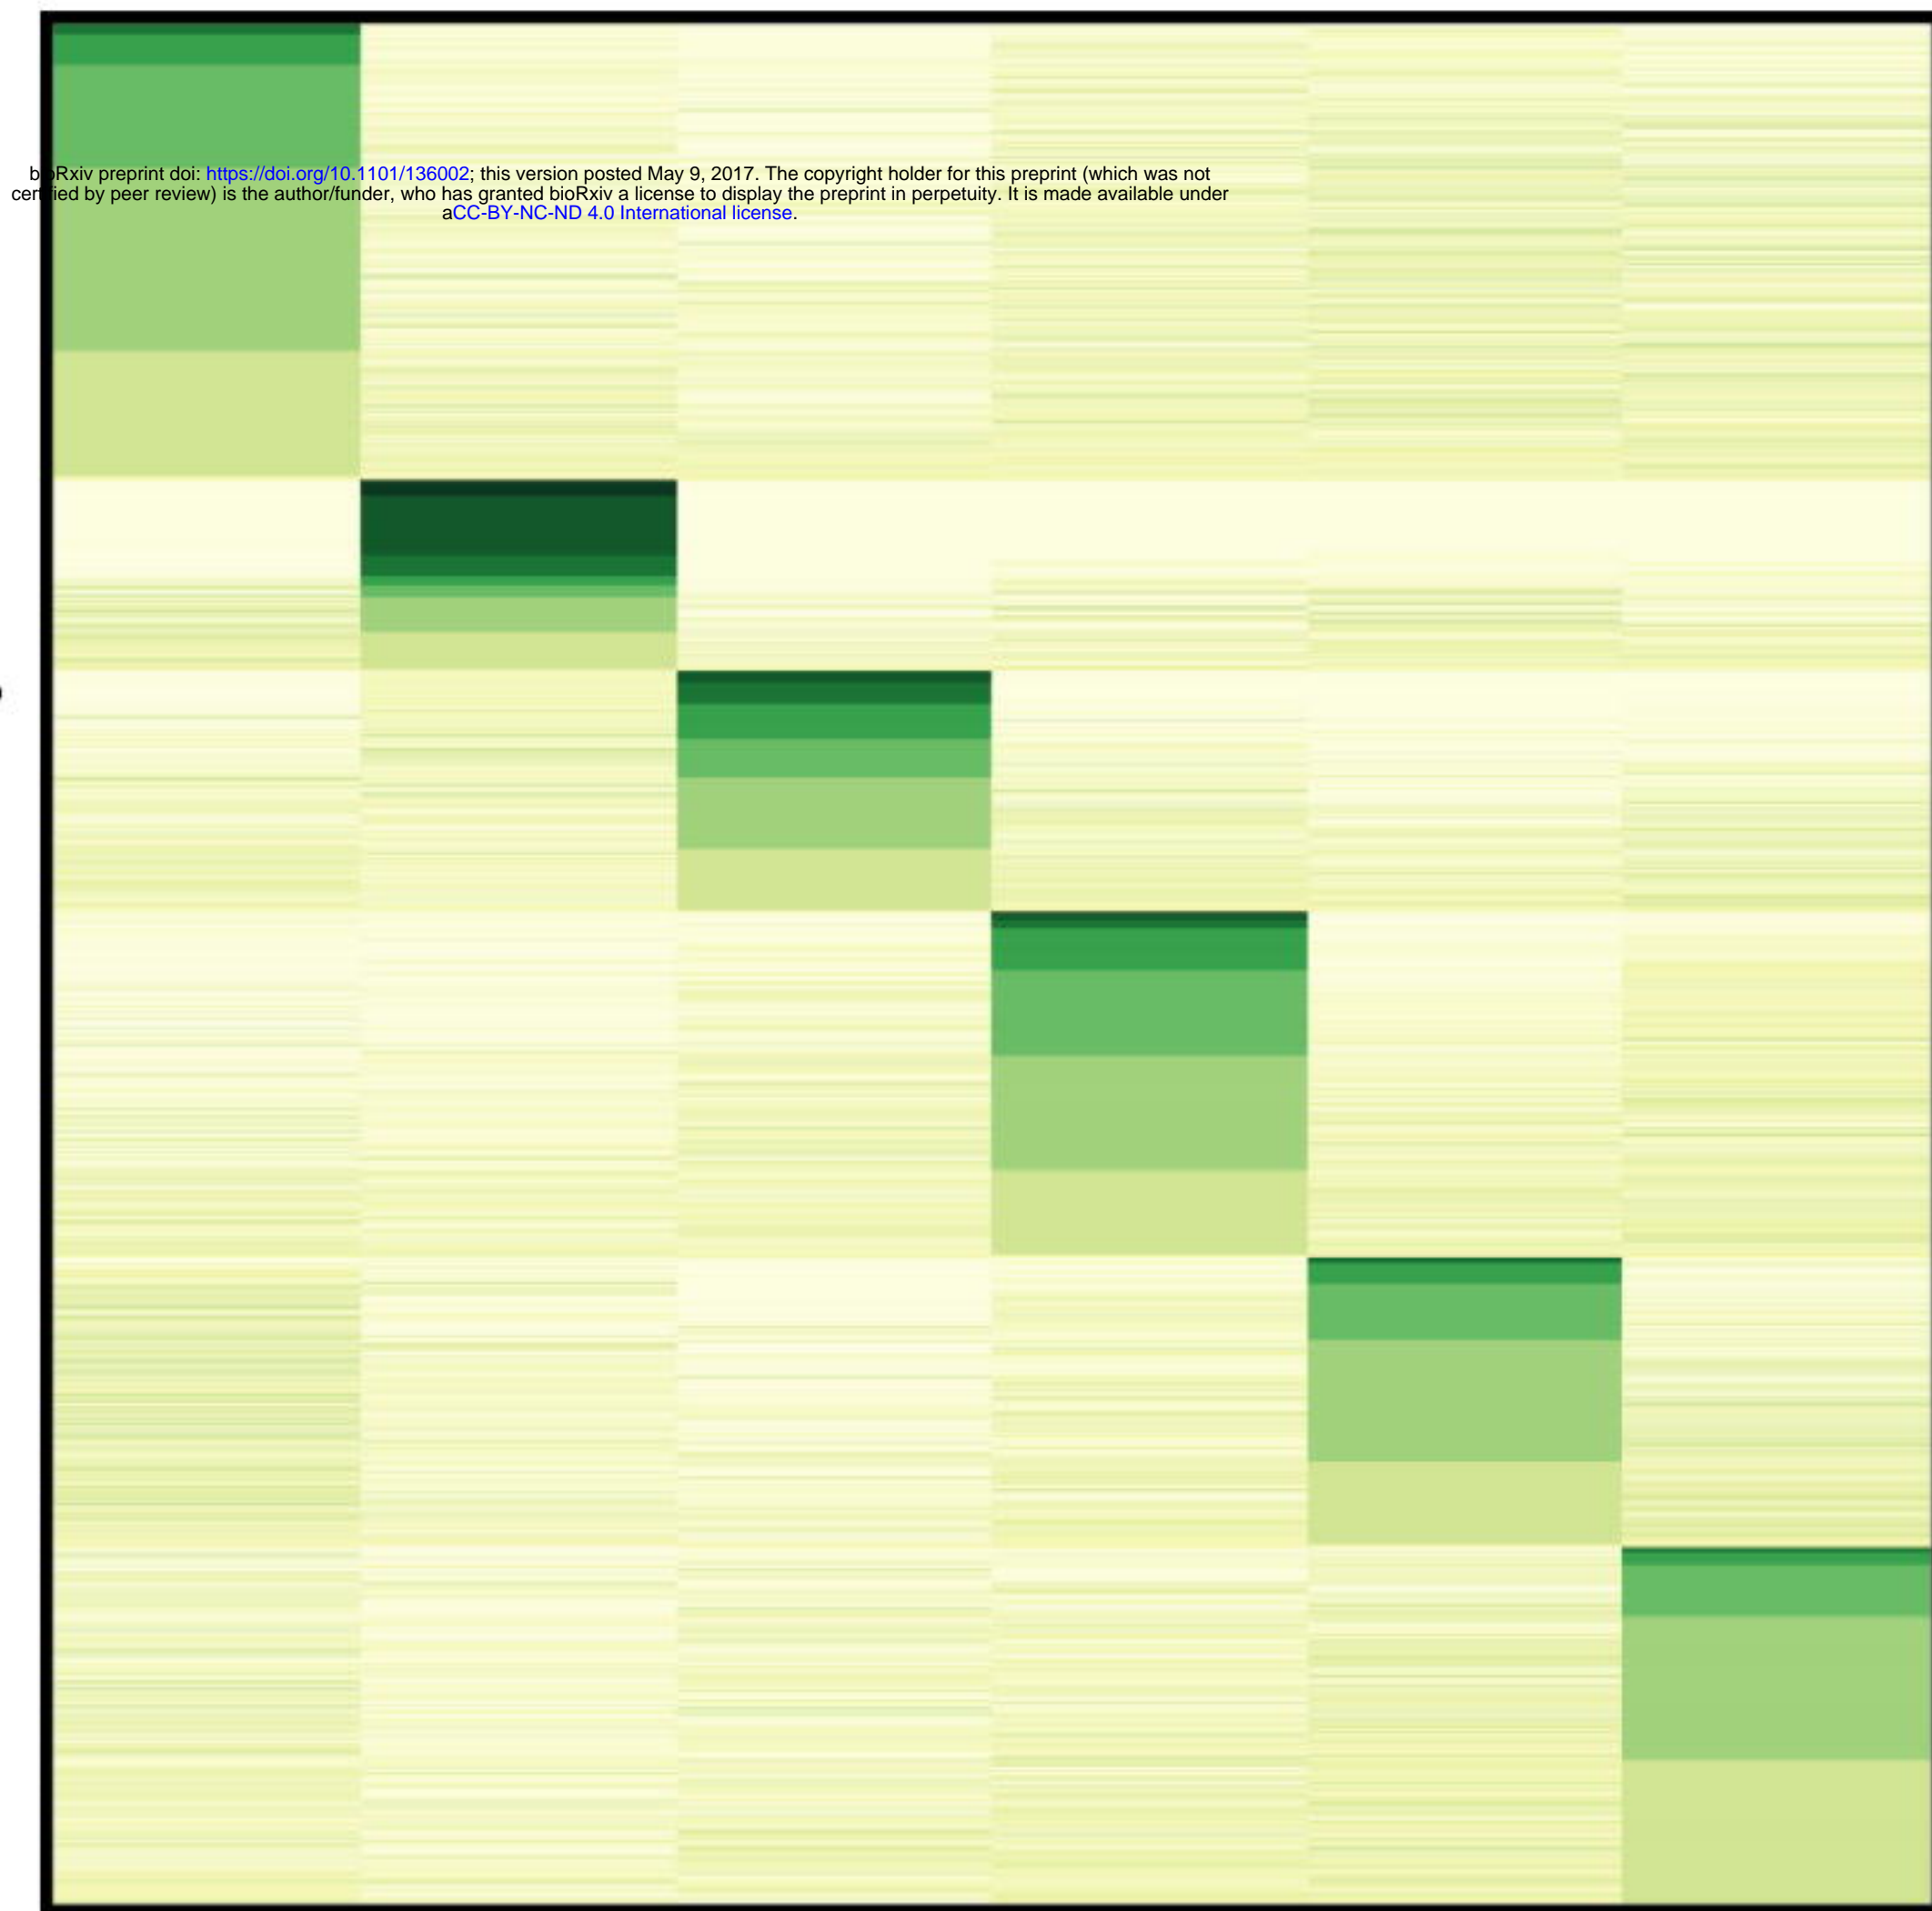

bioRxiv preprint doi: <https://doi.org/10.1101/136002>; this version posted May 9, 2017. The copyright holder for this preprint (which was not certified by peer review) is the author/funder, who has granted bioRxiv a license to display the preprint in perpetuity. It is made available under aCC-BY-NC-ND 4.0 International license.

B

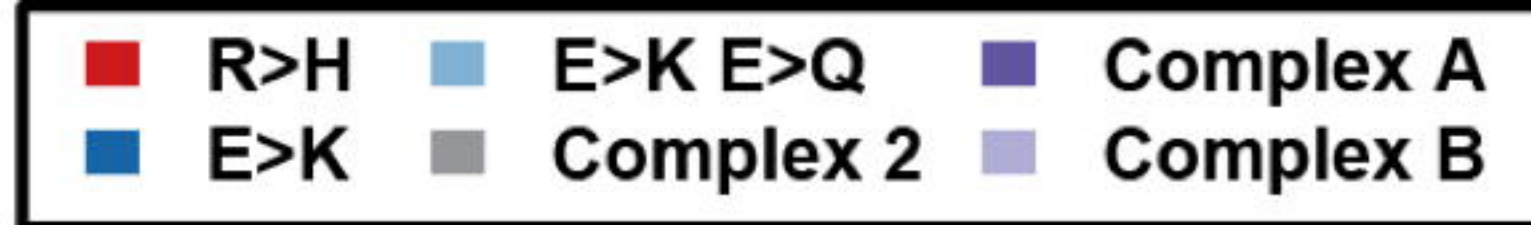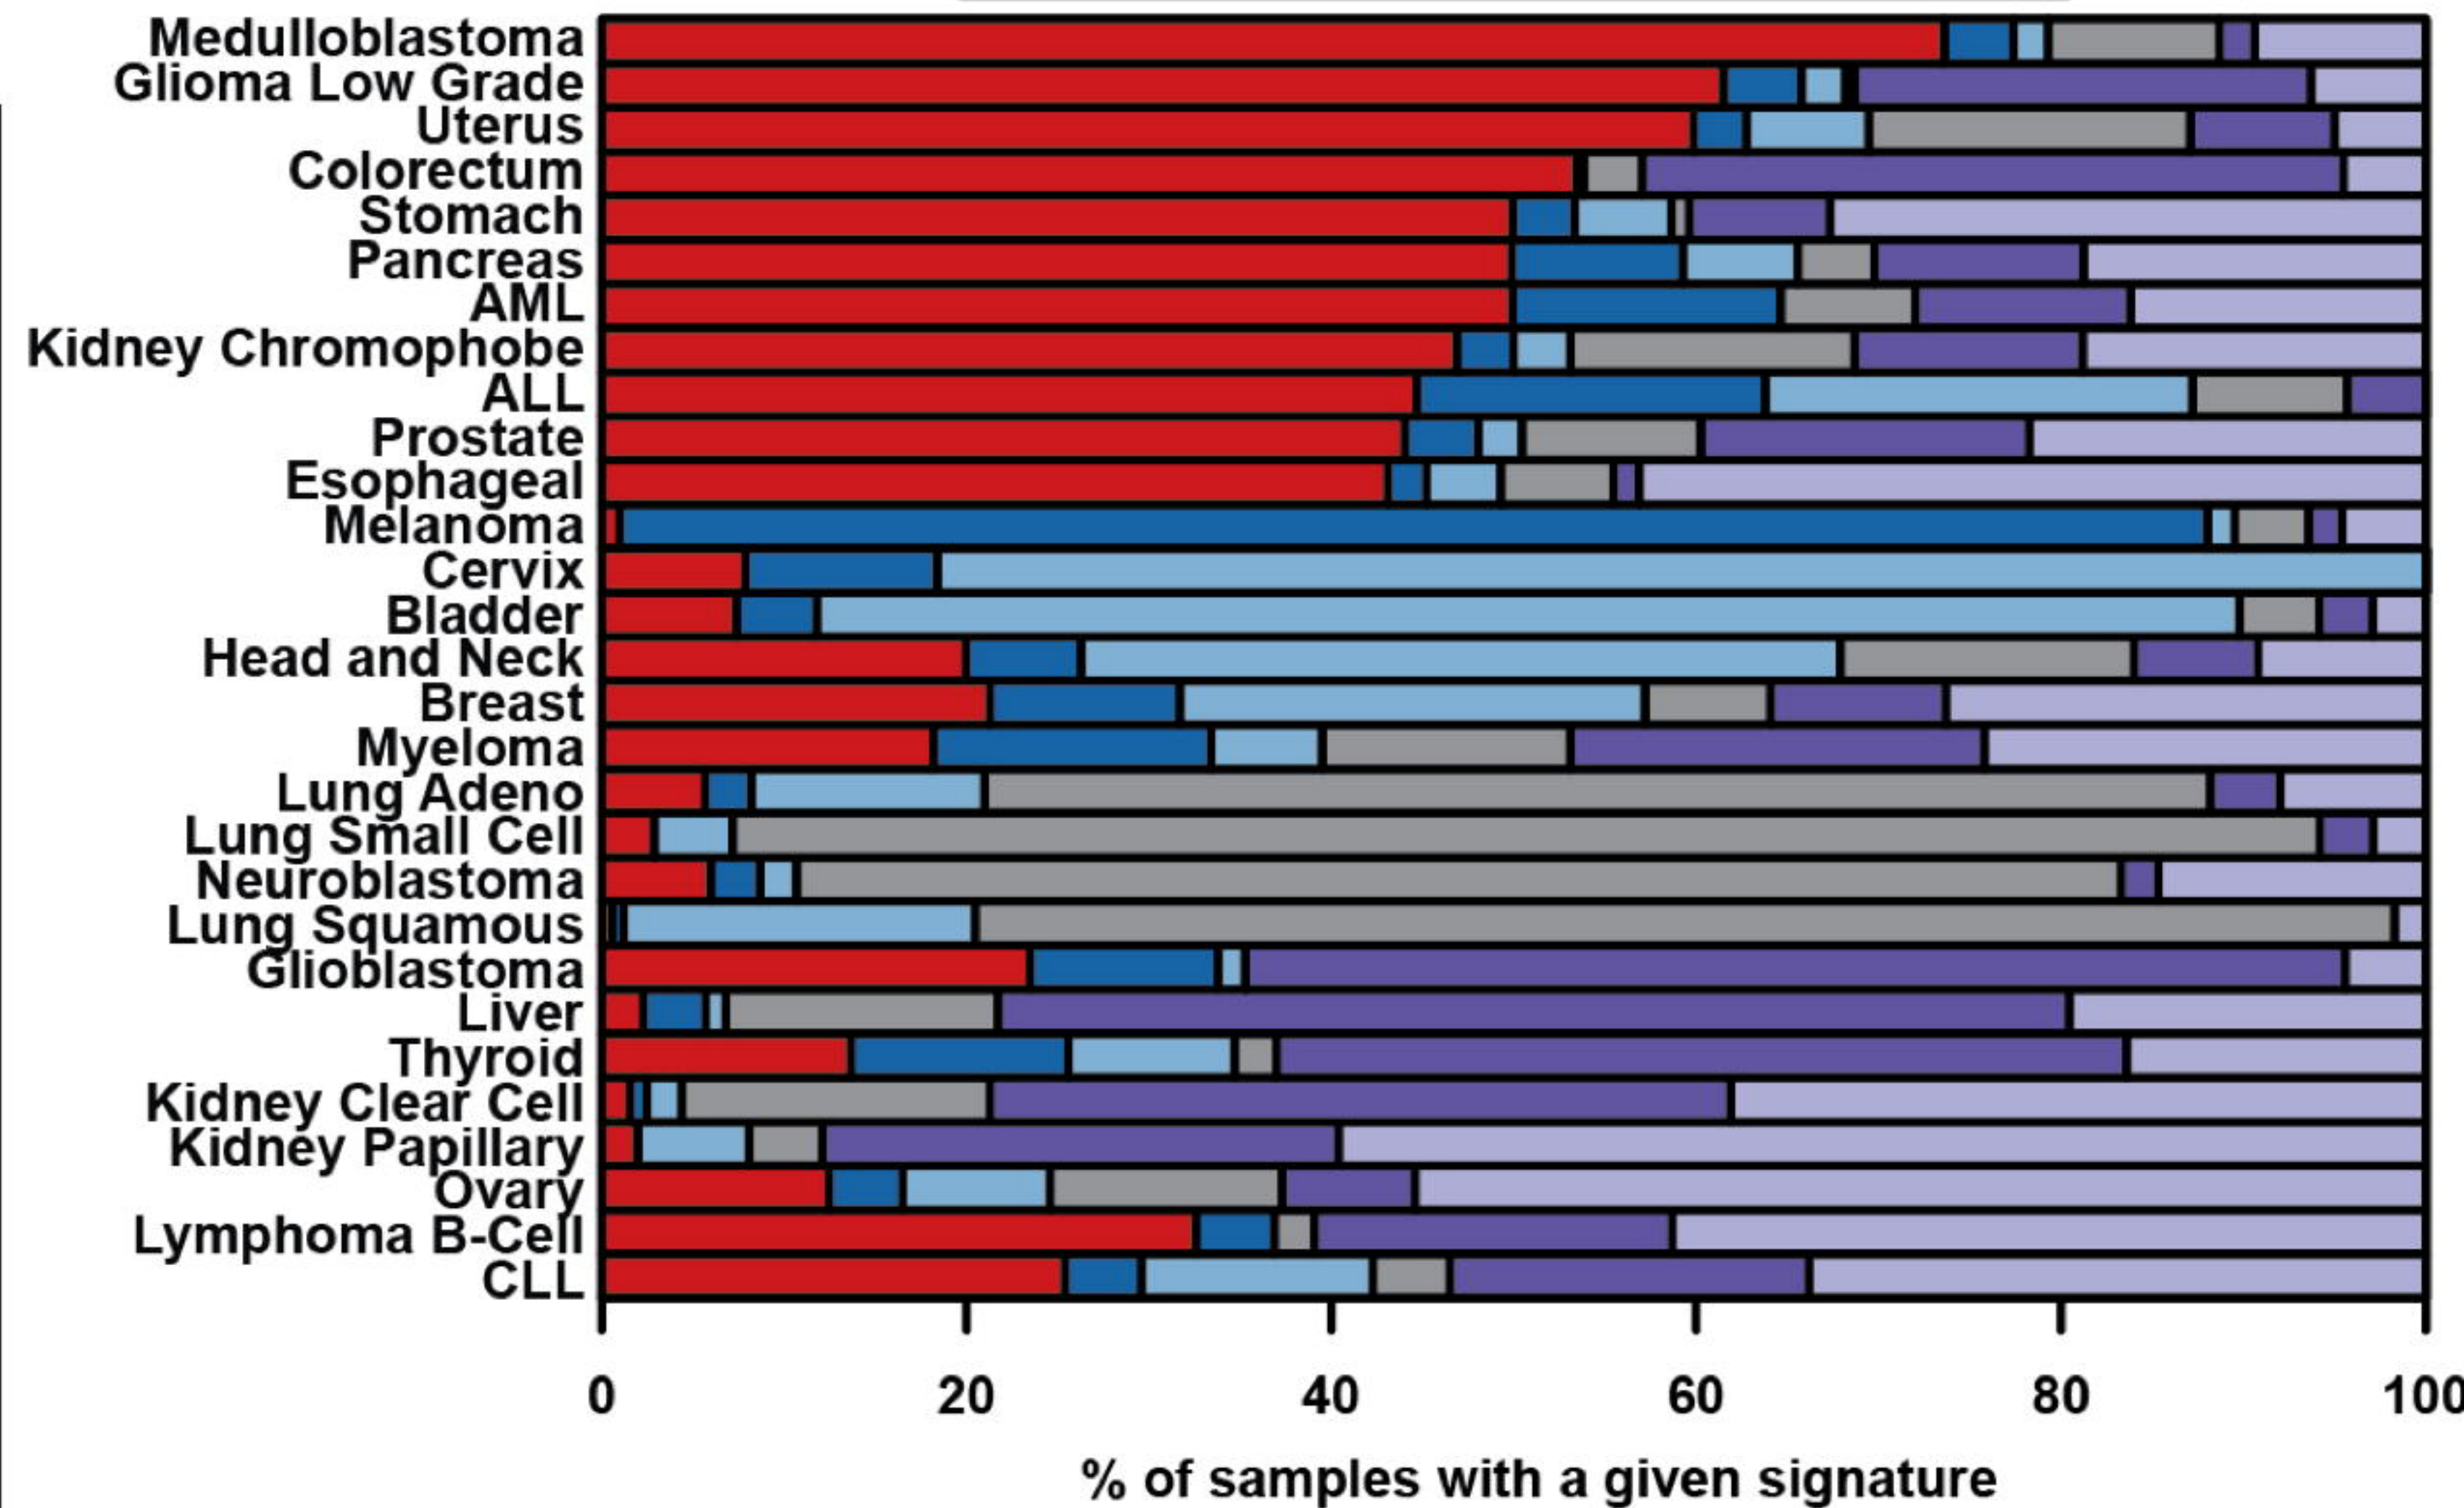

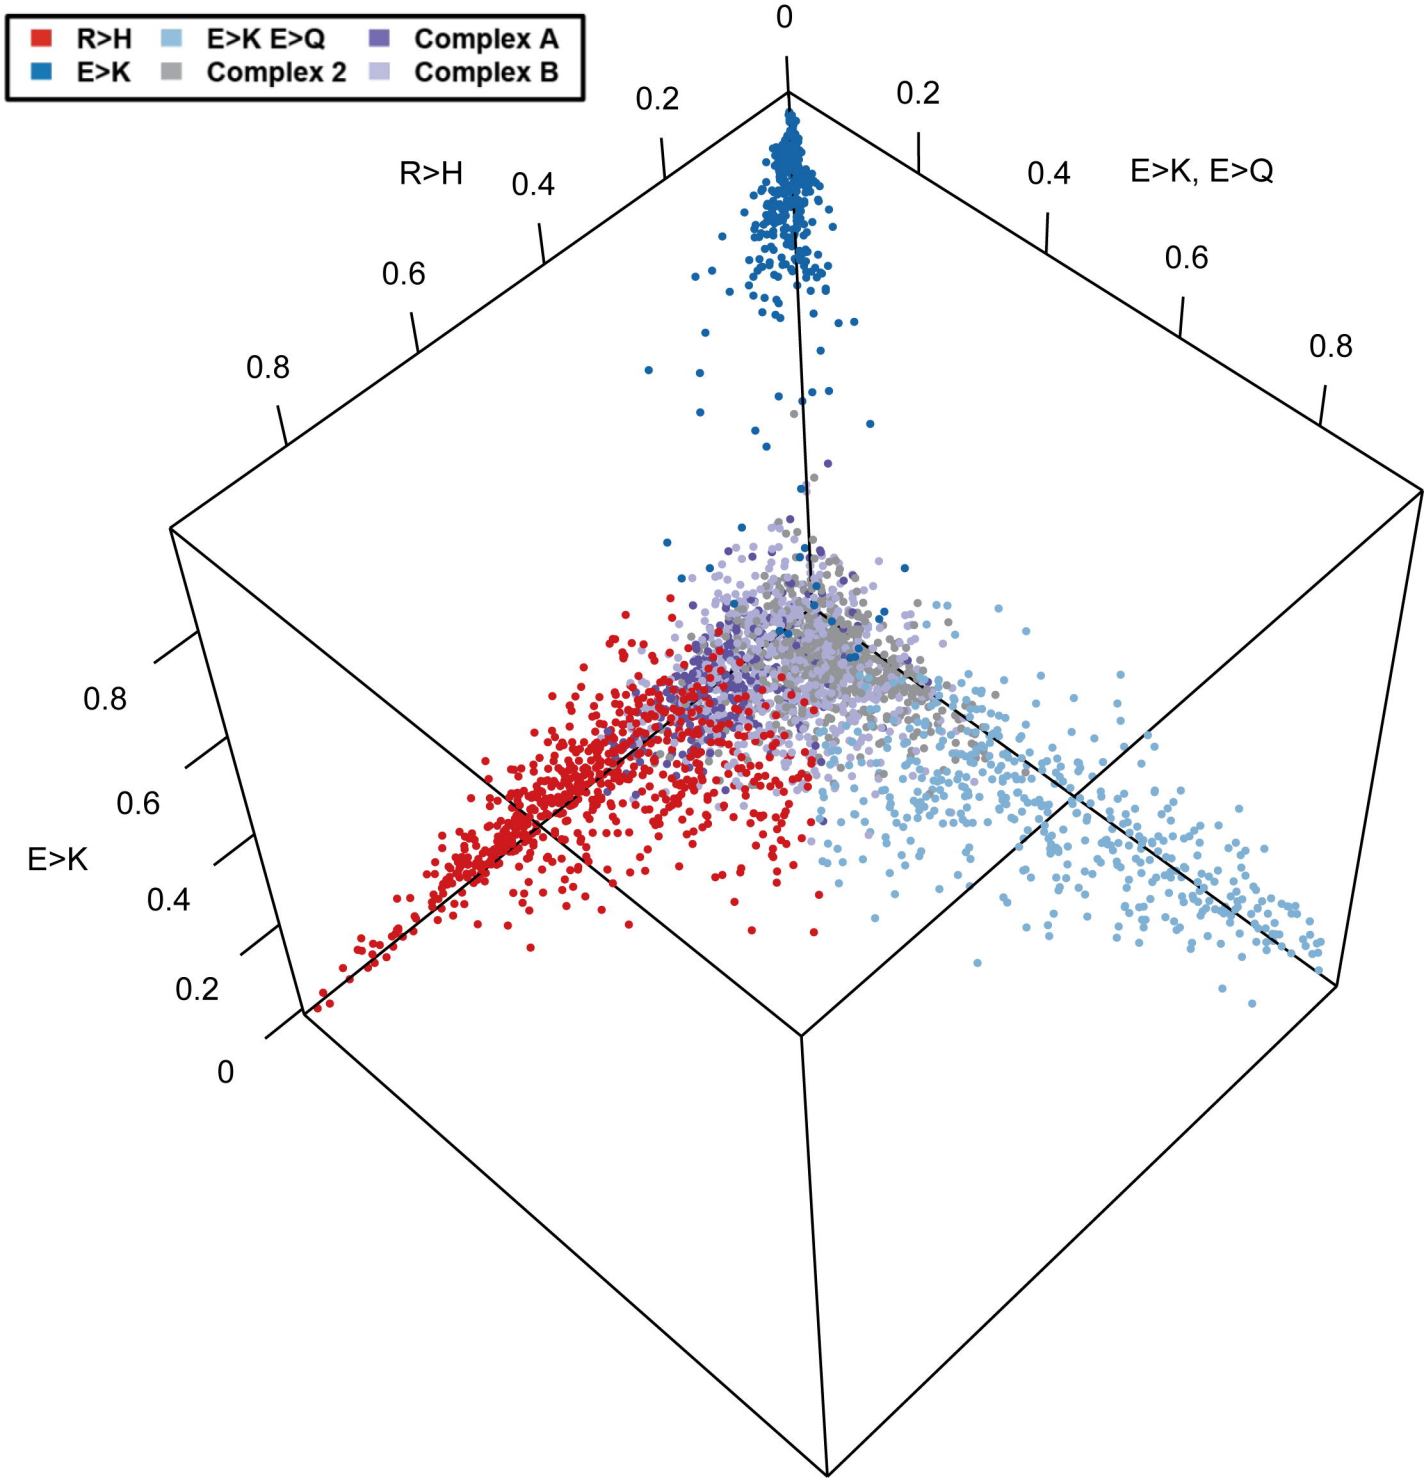

Source: http://biorxiv.org/content/10.1101/136002v1.full.pdf
